# Supplementary material for: “Crowdsourcing” as a tool for e-participation: two experiences regarding CO2 emissions at municipal level
Source: Springer Nature journal article supplement (doi:10.1007/s10660-015-9183-6), 2015-05-09
Supplement: MOESM1 [file 10660_2015_9183_MOESM1_ESM.pdf]

**Article title:** “Crowdsourcing” as a tool for e-participation: two experiences regarding CO2 emissions at municipal level

**Journal name:** Electronic Commerce Research

**Authors:** Sonia Royo and Ana Yetano (Universidad de Zaragoza)

**Emails:** [sroyo@unizar.es](mailto:sroyo@unizar.es), [ayetano@unizar.es](mailto:ayetano@unizar.es)

Appendix 2: Suggestions made by citizens in Zaragoza.

| <b>INITIATIVES</b>                                                                                    | <b>VOTES</b> |
|-------------------------------------------------------------------------------------------------------|--------------|
| <b>MOBILITY</b>                                                                                       | <b>85</b>    |
| Close downtown to the traffic or exclude polluting cars                                               | 15           |
| Electric and hybrid vehicles (incentives...)                                                          | 14           |
| More cycle-lanes and bicycle use                                                                      | 13           |
| Improving public transport                                                                            | 13           |
| Public transport powered by electricity or natural gas                                                | 10           |
| Traffic lights (elimination, intelligent...)                                                          | 5            |
| Subway                                                                                                | 4            |
| Reduce traffic in the city center                                                                     | 3            |
| Remove the tram                                                                                       | 3            |
| Creation of Park & Ride spaces in the outskirts                                                       | 3            |
| Remove the 30 km/hour speed limit                                                                     | 2            |
| <b>SUSTAINABLE URBAN DEVELOPMENT</b>                                                                  | <b>23</b>    |
| Photovoltaic panels                                                                                   | 12           |
| Stop the expansion of the city and recover the city center                                            | 5            |
| Replace coal-fired boilers                                                                            | 5            |
| Encourage the installation of plants (flowerpots) on balconies, terraces, etc. in buildings and homes | 1            |
| <b>PUBLIC AWARENESS MEASURES</b>                                                                      | <b>21</b>    |
| Public awareness of energy consumption and water recycling                                            | 7            |
| Improving driver behavior with respect to cyclists and pedestrians                                    | 5            |
| Politicians should use public transport to lead by example                                            | 4            |
| Planting more trees                                                                                   | 2            |
| More renewable energy                                                                                 | 1            |
| Set the target of Zaragoza city Carbon Neutral by 2025                                                | 1            |
| Totally organic waste containers for composting                                                       | 1            |
| <b>SAVING IN PUBLIC BUILDINGS</b>                                                                     | <b>18</b>    |
| Monitor air conditioning and heating in public buildings                                              | 9            |
| Monitor lighting (especially in sport facilities ...)                                                 | 9            |
| <b>ECONOMIC MEASURES</b>                                                                              | <b>11</b>    |
| Water saving in irrigation (replacing sprinklers by trickle irrigation)                               | 6            |
| Reduction of Income Tax for companies with reduced CO <sub>2</sub>                                    | 3            |
| Change from drinking water to grey water for irrigation purposes                                      | 2            |
| <b>LIGHTING</b>                                                                                       | <b>4</b>     |
| Savings in lighting (replacement by low consumption, less lighting, sensors ...)                      | 4            |
| <b>MISCELLANEA</b>                                                                                    | <b>7</b>     |
| Resignation of politicians                                                                            | 1            |
| Part of the local police patrolling on foot                                                           | 1            |
| Monitor polluting industries and anti-pollution measures                                              | 1            |
| Develop a water consumption reduction system                                                          | 1            |
| Program for the energetic rehabilitation of buildings                                                 | 1            |
| Promotion of local products                                                                           | 1            |
| Promote continuous working day for not taking the car at midday                                       | 1            |

### Appendix 3: Suggestions made by citizens in Pamplona.

| <b>INITIATIVES</b>                                                                                                                                              | <b>VOTES</b> |
|-----------------------------------------------------------------------------------------------------------------------------------------------------------------|--------------|
| <b>MOBILITY</b>                                                                                                                                                 | <b>141</b>   |
| More cycle-lanes (city, metropolitan area and roads) / Improve cycle-lanes (reduce obstacles...) / More free parking for bikes/ Allow bikes in public transport | 45           |
| Improving public transport                                                                                                                                      | 34           |
| Close (Reduce) downtown to the traffic or exclude polluting cars                                                                                                | 21           |
| Creation of Park & Ride spaces in the outskirts, eliminate parking in the city center                                                                           | 7            |
| Promote vehicles powered by electricity or hybrids                                                                                                              | 6            |
| More points for bike rental and increase the number of bikes                                                                                                    | 6            |
| Public transport powered by electricity or natural gas                                                                                                          | 6            |
| Promote walking among citizens/ create path, routes for pedestrians and bikes to schools and industrial areas                                                   | 5            |
| Reduce speed (Increase the areas 30 km/h; reduce speed on highways) and make effective controls                                                                 | 3            |
| Promote a different model of individual transport (share cars)                                                                                                  | 2            |
| Reorganization of traffic to avoid traffic jams / Reduce the waiting time at traffic lights                                                                     | 2            |
| Make businesses responsible for their employees' transportation                                                                                                 | 2            |
| Vehicle control (gases and noise)                                                                                                                               | 1            |
| Subway / Streetcar                                                                                                                                              | 1            |
| <b>ECONOMIC MEASURES</b>                                                                                                                                        | <b>37</b>    |
| Cheaper public transport (continuous use, students, season tickets...)                                                                                          | 19           |
| Greater control over industries (emission taxes, sanctions...)                                                                                                  | 5            |
| Awards/advantages for public and private institutions with low CO <sub>2</sub> emissions (for example, less taxes)                                              | 5            |
| Discounts or reductions in bike rentals                                                                                                                         | 3            |
| Payment for using the car in the city center                                                                                                                    | 2            |
| Responsible production: reduction of waste in industrial activities                                                                                             | 1            |
| Reduction of car taxes for electric cars                                                                                                                        | 1            |
| Different quality of water for different uses (grey water for irrigation and car wash...)                                                                       | 1            |
| <b>PUBLIC AWARENESS MEASURES</b>                                                                                                                                | <b>36</b>    |
| Public awareness about the consequences of pollution and climate change (experts conferences, recycling ...)                                                    | 11           |
| Promote the use of solar and wind energy, biofuel (grants, ...)                                                                                                 | 7            |
| Road education for the coexistence of vehicles, bikes and pedestrians                                                                                           | 4            |
| Campaigns for the development of environmental civic-mindedness of children and adults                                                                          | 4            |
| Give publicity to the different initiatives to reduce CO <sub>2</sub>                                                                                           | 3            |
| Campaigns to promote the consumption of local products                                                                                                          | 2            |
| Promote outdoors activities to make people aware of the environment                                                                                             | 1            |
| Campaigns for the use of bikes                                                                                                                                  | 1            |
| Urban ecological vegetable gardens for young and old people                                                                                                     | 1            |
| More environmental information at universities                                                                                                                  | 1            |
| Promote the use of tap water (instead of bottled water)                                                                                                         | 1            |
| <b>SUSTAINABLE URBAN DEVELOPMENT</b>                                                                                                                            | <b>33</b>    |
| Do not eliminate green zones / Maintain the vegetable gardens of Aranzadi, etc.                                                                                 | 10           |
| More green zones in the city (especially with autochthonous plants)                                                                                             | 6            |
| Photovoltaic panels (mandatory implementation / grants)                                                                                                         | 6            |
| Renovate energetic systems of buildings (grants to renovate heating systems and to improve thermic isolation)                                                   | 5            |
| Avoid city expansion and recover the city center / No more shopping malls outside the city                                                                      | 2            |
| Renovate abandoned buildings and avoid new buildings / Do not leave works unfinished                                                                            | 2            |
| Solve canalization problems and networks of technical infrastructures                                                                                           | 1            |
| Promote central heating in neighborhood communities                                                                                                             | 1            |

|                                                                                                                                     |           |
|-------------------------------------------------------------------------------------------------------------------------------------|-----------|
| <b>SAVING IN PUBLIC BUILDINGS</b>                                                                                                   | <b>20</b> |
| Monitor air conditioning and heating in public buildings                                                                            | 12        |
| Review the effectiveness and isolation of public buildings                                                                          | 2         |
| Centralize municipal services to reduce the number of public buildings                                                              | 1         |
| Reduce the use of paper in municipal mailing to citizens                                                                            | 1         |
| Adapt public buildings to the law of protection of night sky                                                                        | 1         |
| Selective waste collection                                                                                                          | 1         |
| Turn off public building lighting when they are closed                                                                              | 1         |
| Install biomass heating in public buildings                                                                                         | 1         |
| <b>PUBLIC MANAGEMENT MEASURES</b>                                                                                                   | <b>24</b> |
| Official vehicles: share / reduce /eliminate /electric/ with low emissions                                                          | 9         |
| Politicians and the council should be an example in energy reduction and efficiency                                                 | 6         |
| Consider environmental criteria in ALL municipal activities / More information and training for politicians in environmental topics | 2         |
| Reduction of personnel (councilors, mayor assistants...)                                                                            | 1         |
| Purchase policies that promote the use of local products                                                                            | 1         |
| Favor action plans that promote a model of decreases in energy consumption                                                          | 1         |
| Transparency in the measures adopted and the rationale behind their adoption                                                        | 1         |
| Mandatory training for managers and employees of the business in sustainability topics                                              | 1         |
| Promote teleworking to avoid travelling                                                                                             | 1         |
| Introduce measures of energy saving in public procurement conditions                                                                | 1         |
| <b>LIGHTING</b>                                                                                                                     | <b>12</b> |
| Reduce street lighting                                                                                                              | 6         |
| Savings in lighting (replacement by low consumption, less lighting, sensors ...)                                                    | 3         |
| Eliminate or reduce Christmas lighting                                                                                              | 2         |
| Better lighting management in uninhabited areas                                                                                     | 1         |
| <b>MISCELLANEA POLITICAL POLICIES</b>                                                                                               | <b>12</b> |
| Increase citizen participation / Reach consensus on decisions with citizens                                                         | 5         |
| Improve waste treatment / Fulfill the recycling protocol in the waste collection points                                             | 3         |
| Promote actions that reduce CO <sub>2</sub> emissions                                                                               | 1         |
| Implement initiatives that have been successful in other European cities                                                            | 1         |
| Greater cooperation among public institutions (universities and research institutes)                                                | 1         |
| Promote vegetarianism                                                                                                               | 1         |
| <b>MISCELLANEA (NOT DIRECTLY RELATED WITH MUNICIPAL MANAGEMENT)</b>                                                                 | <b>5</b>  |
| Facilitate the contracting of green energy                                                                                          | 1         |
| Increase R&D investment in energy effectiveness                                                                                     | 1         |
| Prohibit the use of energy from coal                                                                                                | 1         |
| Improve public transport between Navarre and bordering regions                                                                      | 1         |
| Improve the effectiveness of household electronic equipment                                                                         | 1         |
